# Supplementary material for: High prevalence and circulant genotypes of Chlamydia trachomatis in vulnerable university women from four cities in the Brazilian Amazon
Source: Research Square preprint supplement (doi:10.21203/rs.3.rs-2241892/v1), 2022-11-17
Supplement: Supplementary file 1 [file f57e6037778de75fe342df2f.docx]

| S1: Accession numbers of nucleotide sequences of *ompA* gene fragment of the *Chlamydia trachomatis*. These sequences are posted at www.ncbi.nlm.nih.gov/genbank | | | |
| --- | --- | --- | --- |
| Access Number | Strain | Genotype | County* |
| MZ787585 | 249 | J | Belém |
| MK213751 | NMT249 | J | Castanhal |
| MZ787589 | 072 | J | Belém |
| MK213744 | NMT072 | J | Castanhal |
| MZ787586 | 242 | J | Belém |
| MK213750 | NMT242 | J | Belém |
| **MZ787587** | 07 | J | Belém |
| **MZ787588** | 078 | J | Castanhal |
| **MK213745** | NMT078 | J | Castanhal |
| **MZ787595** | 015 | F | Belém |
| **MZ787594** | 091 | F | Belém |
| **MK213746** | NMT091 | F | Belém |
| **MK213742** | NMT015 | F | Belém |
| **MZ787593** | 10 | F | Belém |
| **MZ787592** | 14 | F | Castanhal |
| **MZ787598** | 053 | E | Belém |
| **MZ787597** | 129 | E | Belém |
| **MK213747** | NMT129 | E | Belém |
| **MK213743** | NMT053 | E | Castanhal |
| **MZ787596** | 37 | E | Altamira |
| **MZ787602** | 18 | D | Castanhal |
| **MZ787603** | 17 | D | Belém |
| **MZ787600** | 48 | D | Belém |
| **MZ787604** | 15 | D | Belém |
| **MZ787599** | 911 | D | Belém |
| **MK213752** | NMT911 | D | Belém |
| **MZ787601** | 216 | D | Belém |
| **MK213749** | NMT2016 | D | Belém |
| **MZ787591** | 04 | G | Bragança |
| **MZ787590** | 09 | Ia | Castanhal |
| **MK213748** | NMT144 | Ia | Bragança |
| **MZ787583** | 46 | K | Belém |
| **MZ787584** | 21 | K | Belém |
| *Para State, Brazil. | | | |
